# Supplementary material for: HIV-1 Infection Accelerates Age According to the Epigenetic Clock
Source: PubMed Central journal article supplement — J Infect Dis. 2015 May 12;212(10):1563–73. doi: 10.1093/infdis/jiv277 (PMC4621253; doi:10.1093/infdis/jiv277), 2015-05-12

GSE39981 p = 0.56

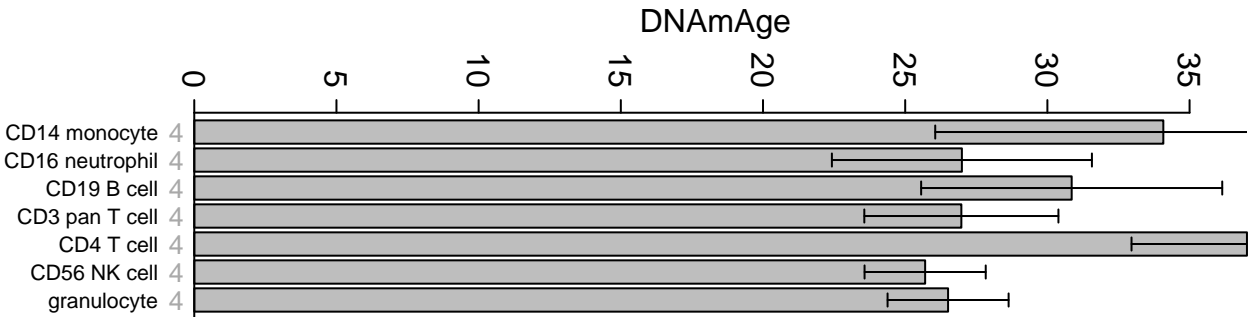

GSE35069 p = 0.81

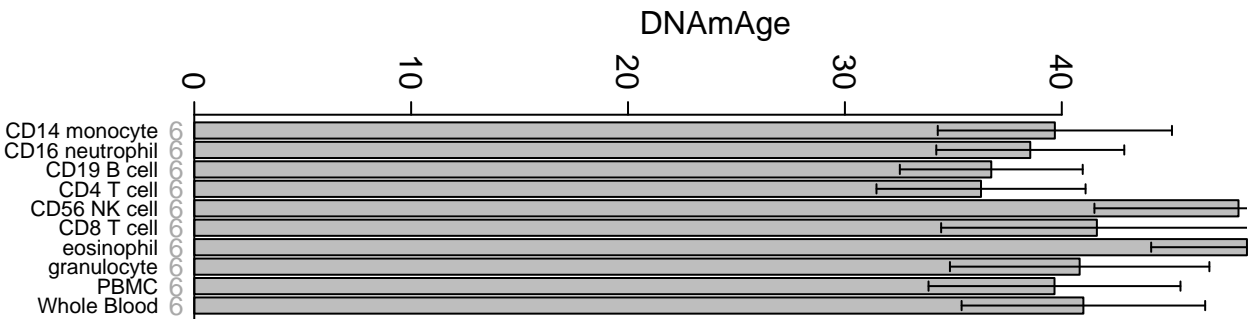

GSE20242 p = 0.21

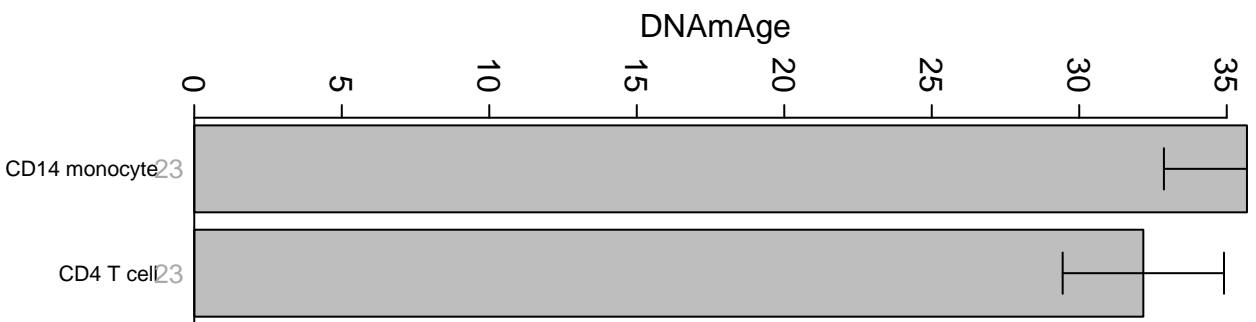

E-ERAD-179 p = 0.20

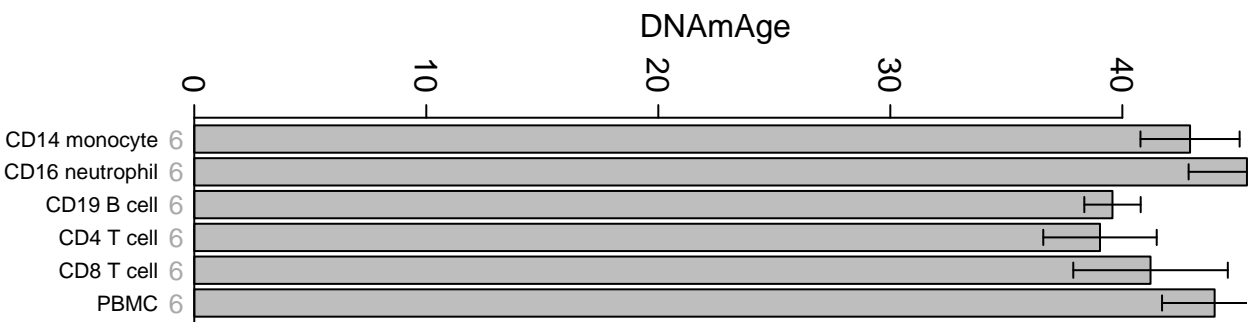

Supplement: supp_jiv277_jiv277supp_fig1.pdf [file supp_jiv277_jiv277supp_fig1.pdf]
